# Supplementary material
Source: publisher site journal article supplement (https://www.dovepress.com/article/264592)
Supplement: Supplementary file 1 [file get_supplementary_file.php]

**Appendix 1**

**Focus group discussion guiding questions**

1. What foods do you eat mostly during pregnancy?

Probe: do you consume fruits and vegetables?

1. Do you know the importance of consuming fruits and vegetables during pregnancy?
2. Do you know what is iron and vitamin A as far as nutrition is concerned?
3. Can you tell me the symptoms and consequences of anemia during pregnancy?
4. Can you tell me the symptoms and consequences of vitamin A deficiency during pregnancy?
5. Do you know any health outcomes caused by cultural dietary restrictions during pregnancy?
6. Where do you get nutrition knowledge/advice during pregnancy?
